# Supplementary material for: Clinical features of snoring patients during sedative endoscopy
Source: PubMed Central journal article supplement — Korean J Intern Med. 2017 Nov 15;34(2):305–14. doi: 10.3904/kjim.2017.110 (PMC6406094; doi:10.3904/kjim.2017.110), 2017-11-15
Supplement: kjim-2017-110-suppl1.pdf [file kjim-2017-110-suppl1.pdf]

**Supplementary Table 1. The Korean version of the Berlin Questionnaire**

| Categories                                             | Item content                                                                                                                                                                                                                                                                                                                                                                                                                                                                                                                                                                                                                                                                                                                                                                                                                                                                                                                                                                                                                                                                                                                 |
|--------------------------------------------------------|------------------------------------------------------------------------------------------------------------------------------------------------------------------------------------------------------------------------------------------------------------------------------------------------------------------------------------------------------------------------------------------------------------------------------------------------------------------------------------------------------------------------------------------------------------------------------------------------------------------------------------------------------------------------------------------------------------------------------------------------------------------------------------------------------------------------------------------------------------------------------------------------------------------------------------------------------------------------------------------------------------------------------------------------------------------------------------------------------------------------------|
| Category 1.<br>Habitual snoring                        | <ol style="list-style-type: none"> <li>1. Do you snore?               <ol style="list-style-type: none"> <li>a. Yes</li> <li>b. No</li> <li>c. Do not know</li> </ol> </li> <li>2. If yes, loudness of your snoring is:               <ol style="list-style-type: none"> <li>a. As loud as breathing</li> <li>b. As loud as talking</li> <li>c. Louder than talking</li> </ol> </li> <li>3. How often do you snore?               <ol style="list-style-type: none"> <li>a. Almost every day</li> <li>b. 3–4 times per week</li> <li>c. 1–2 times per week</li> <li>d. 1–2 times per month</li> <li>e. Rarely or almost never</li> </ol> </li> <li>4. Has your snoring ever bothered other people?               <ol style="list-style-type: none"> <li>a. Yes</li> <li>b. No</li> <li>c. Do not know</li> </ol> </li> <li>5. Has anyone noticed that you stop breathing during your sleep?               <ol style="list-style-type: none"> <li>a. Almost every day</li> <li>b. 3–4 times per week</li> <li>c. 1–2 times per week</li> <li>d. 1–2 times per month</li> <li>e. Rarely or almost never</li> </ol> </li> </ol> |
| Category 2.<br>Wake-time sleepiness or tiredness       | <ol style="list-style-type: none"> <li>6. How often do you feel tired or fatigued after sleeping?               <ol style="list-style-type: none"> <li>a. Almost every day</li> <li>b. 3–4 times per week</li> <li>c. 1–2 times per week</li> <li>d. 1–2 times per month</li> <li>e. Rarely or almost never</li> </ol> </li> <li>7. During your waking time, do you feel tired, fatigued or not up to par?               <ol style="list-style-type: none"> <li>a. Almost every day</li> <li>b. 3–4 times per week</li> <li>c. 1–2 times per week</li> <li>d. 1–2 times per month</li> <li>e. Rarely or almost never</li> </ol> </li> <li>8. Have you ever nodded off or fallen asleep while driving a vehicle?               <ol style="list-style-type: none"> <li>a. Yes</li> <li>b. No</li> </ol> </li> <li>9. If yes, how often does this occur?               <ol style="list-style-type: none"> <li>a. Almost every day</li> <li>b. 3–4 times per week</li> <li>c. 1–2 times per week</li> <li>d. 1–2 times per month</li> <li>e. Rarely or almost never</li> </ol> </li> </ol>                                       |
| Category 3.<br>The presence of hypertension or obesity | <ol style="list-style-type: none"> <li>10. Do you have high blood pressure?               <ol style="list-style-type: none"> <li>a. Yes</li> <li>b. No</li> <li>c. Do not know</li> </ol> </li> </ol>                                                                                                                                                                                                                                                                                                                                                                                                                                                                                                                                                                                                                                                                                                                                                                                                                                                                                                                        |
