# Supplementary material for: Clinical features of snoring patients during sedative endoscopy
Source: PubMed Central journal article supplement — Korean J Intern Med. 2017 Nov 15;34(2):305–14. doi: 10.3904/kjim.2017.110 (PMC6406094; doi:10.3904/kjim.2017.110), 2017-11-15
Supplement: kjim-2017-110-suppl2.pdf [file kjim-2017-110-suppl2.pdf]

**Supplementary Table 2. The Alcohol Use Disorders Identification Test (AUDIT)**

| Domains               | Item content                                                                                                                                                                                                                                                                                                                                                                                                                                                                                                                                                                                                                                                                                                                                                                                                                                                                                                                                                                              |
|-----------------------|-------------------------------------------------------------------------------------------------------------------------------------------------------------------------------------------------------------------------------------------------------------------------------------------------------------------------------------------------------------------------------------------------------------------------------------------------------------------------------------------------------------------------------------------------------------------------------------------------------------------------------------------------------------------------------------------------------------------------------------------------------------------------------------------------------------------------------------------------------------------------------------------------------------------------------------------------------------------------------------------|
| Hazardous alcohol use | <ol style="list-style-type: none"> <li>1. How often do you have a drink containing alcohol?               <ol style="list-style-type: none"> <li>0. Never</li> <li>1. Monthly or less</li> <li>2. 2–4 times a month</li> <li>3. 2–3 times a week</li> <li>4. 4 or more times a week</li> </ol> </li> <li>2. How many drinks containing alcohol do you have on a typical day when you are drinking?               <ol style="list-style-type: none"> <li>0. 1 or 2</li> <li>1. 3 or 4</li> <li>2. 5 or 6</li> <li>3. 7 to 9</li> <li>4. 10 or more</li> </ol> </li> <li>3. How often do you have six or more drinks on one occasion?               <ol style="list-style-type: none"> <li>0. Never</li> <li>1. Less than monthly</li> <li>2. Monthly</li> <li>3. Weekly</li> <li>4. Daily or almost daily</li> </ol> </li> </ol>                                                                                                                                                           |
| Dependence symptoms   | <ol style="list-style-type: none"> <li>4. How often during the last year have you found that you were not able to stop drinking once you had started?               <ol style="list-style-type: none"> <li>0. Never</li> <li>1. Less than monthly</li> <li>2. Monthly</li> <li>3. Weekly</li> <li>4. Daily or almost daily</li> </ol> </li> <li>5. How often during the last year have you failed to do what was normally expected of you because of drinking?               <ol style="list-style-type: none"> <li>0. Never</li> <li>1. Less than monthly</li> <li>2. Monthly</li> <li>3. Weekly</li> <li>4. Daily or almost daily</li> </ol> </li> <li>6. How often during the last year have you needed a first drink in the morning to get yourself going after a heavy drinking session?               <ol style="list-style-type: none"> <li>0. Never</li> <li>1. Less than monthly</li> <li>2. Monthly</li> <li>3. Weekly</li> <li>4. Daily or almost daily</li> </ol> </li> </ol> |

**Supplementary Table 2. Continued**

| Domains             | Item content                                                                                                                                                                                                                                                                                                                                                                                                                                                                                                                                                                                                                                                                                                                                                                                                                                                                                                                                                                                                                                        |
|---------------------|-----------------------------------------------------------------------------------------------------------------------------------------------------------------------------------------------------------------------------------------------------------------------------------------------------------------------------------------------------------------------------------------------------------------------------------------------------------------------------------------------------------------------------------------------------------------------------------------------------------------------------------------------------------------------------------------------------------------------------------------------------------------------------------------------------------------------------------------------------------------------------------------------------------------------------------------------------------------------------------------------------------------------------------------------------|
| Harmful alcohol use | 7. How often during the last year have you had a feeling of guilt or remorse after drinking? <ul style="list-style-type: none"> <li>o. Never</li> <li>1. Less than monthly</li> <li>2. Monthly</li> <li>3. Weekly</li> <li>4. Daily or almost daily</li> </ul> 8. How often during the last year have you been unable to remember what happened the night before because of your drinking? <ul style="list-style-type: none"> <li>o. Never</li> <li>1. Less than monthly</li> <li>2. Monthly</li> <li>3. Weekly</li> <li>4. Daily or almost daily</li> </ul> 9. Have you or someone else been injured because of your drinking? <ul style="list-style-type: none"> <li>o. Never</li> <li>2. Yes, but not in the last year</li> <li>4. Yes, during the last year</li> </ul> 10. Has a relative, friend, doctor, or other health care worker been concerned about your drinking or suggested you cut down? <ul style="list-style-type: none"> <li>o. Never</li> <li>2. Yes, but not in the last year</li> <li>4. Yes, during the last year</li> </ul> |
