# Supplementary material for: Clinical features of snoring patients during sedative endoscopy
Source: PubMed Central journal article supplement — Korean J Intern Med. 2017 Nov 15;34(2):305–14. doi: 10.3904/kjim.2017.110 (PMC6406094; doi:10.3904/kjim.2017.110), 2017-11-15
Supplement: kjim-2017-110-suppl3.pdf [file kjim-2017-110-suppl3.pdf]

**Supplementary Table 3. Comparison of clinical features of patients according to the history of gastric cancer**

| Variable                                                        | Advanced gastric cancer (n = 9) | No history of advanced gastric cancer (n = 168) |                      |                                        |                      |
|-----------------------------------------------------------------|---------------------------------|-------------------------------------------------|----------------------|----------------------------------------|----------------------|
|                                                                 |                                 | Early gastric cancer (n = 49)                   | p value <sup>a</sup> | No history of gastric cancer (n = 118) | p value <sup>b</sup> |
| Age, yr <sup>c</sup>                                            | 64.0 ± 7.5                      | 63.0 ± 10.1                                     | 0.787                | 61.5 ± 10.6                            | 0.487                |
| Male sex                                                        | 8 (88.9)                        | 36 (73.5)                                       | 0.431                | 75 (63.6)                              | 0.161                |
| Height, cm <sup>c</sup>                                         | 165.0 ± 5.4                     | 163.6 ± 7.1                                     | 0.568                | 165.1 ± 8.5                            | 0.963                |
| Body weight, kg <sup>c</sup>                                    | 59.7 ± 5.2                      | 64.1 ± 10.3                                     | 0.069                | 66.6 ± 13.8                            | 0.005 <sup>d</sup>   |
| Neck circumference, cm <sup>c,e</sup>                           | 36.4 ± 4.4                      | 37.5 ± 3.0                                      | 0.448                | 37.7 ± 3.8                             | 0.440                |
| Obesity (body mass index ≥ 25 kg/m <sup>2</sup> )               | 0                               | 15 (30.6)                                       | 0.094                | 51 (43.2)                              | 0.011 <sup>d</sup>   |
| Habitual snoring symptom ≥ 3/week                               | 4 (44.4)                        | 6 (12.2)                                        | 0.039 <sup>d</sup>   | 32 (27.1)                              | 0.271                |
| Snoring during sedative endoscopy                               | 6 (66.7)                        | 7 (14.3)                                        | 0.002 <sup>d</sup>   | 36 (30.5)                              | 0.058                |
| High risk group of obstructive sleep apnea                      | 3 (33.3)                        | 12 (24.5)                                       | 0.388                | 40 (33.9)                              | 1.000                |
| Gastroesophageal reflux disease <sup>f</sup>                    | 1 (11.1)                        | 6 (12.2)                                        | 1.000                | 21 (19.4)                              | 1.000                |
| Chronic atrophic gastritis on endoscopy <sup>f</sup>            | 0                               | 27 (55.1)                                       | 0.002 <sup>d</sup>   | 57 (52.8)                              | 0.003 <sup>d</sup>   |
| Prevalence of <i>Helicobacter pylori</i> infection <sup>g</sup> | 7 (77.8)                        | 33 (67.3)                                       | 0.706                | 86 (56.6)                              | 0.304                |
| Harmful alcohol use on questionnaire <sup>e</sup>               | 0                               | 3 (6.8)                                         | 1.000                | 18 (20.1)                              | 0.588                |
| Smoker <sup>e</sup>                                             | 2 (33.3)                        | 25 (58.1)                                       | 0.245                | 37 (31.4)                              | 1.000                |
| Coronary artery disease                                         | 0                               | 0                                               | -                    | 6 (5.1)                                | 1.000                |
| Cerebral ischemia                                               | 1 (11.1)                        | 2 (4.1)                                         | 0.403                | 5 (4.2)                                | 0.363                |
| Obstructive sleep apnea, diagnosed                              | 0                               | 0                                               | -                    | 5 (4.2)                                | 1.000                |
| Fatty liver                                                     | 0                               | 0                                               | -                    | 18 (15.3)                              | 0.357                |
| Hypertension                                                    | 4 (44.4)                        | 16 (32.7)                                       | 0.559                | 46 (39.0)                              | 0.738                |
| Diabetes mellitus                                               | 1 (11.1)                        | 4 (8.2)                                         | 1.000                | 14 (11.9)                              | 1.000                |

Values are presented as mean ± SD or number (%).

<sup>a</sup>p value was analysed between group of advanced gastric cancer and group of early gastric cancer.

<sup>b</sup>p value was analysed between group of advanced gastric cancer and group without history of gastric cancer.

<sup>c</sup>Analyzed for 175 patients due to missing values.

<sup>d</sup>Values indicate statistical significance.

<sup>e</sup>Analyzed for 144 patients due to missing values.

<sup>f</sup>Analyzed for 166 patients due to missing values.

<sup>g</sup>Analyzed for 162 patients due to missing values.
